# Supplementary material
Source: MDPI journal article supplement (https://www.mdpi.com/2073-4344/12/4/437)
Supplement: s1 [file s1]

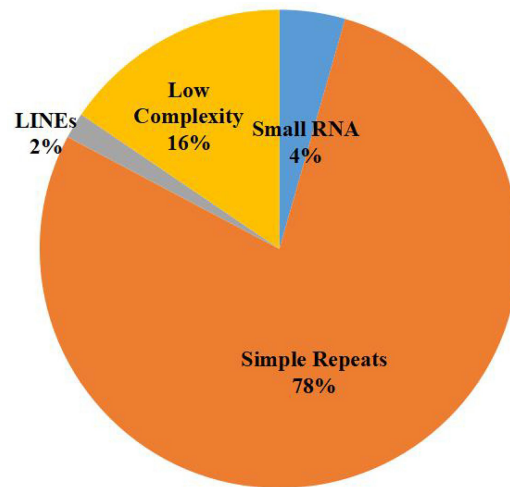

**Figure S1.** Percentage distribution of different types of repetitive elements in the genome of *T. asperellum* ND-1.

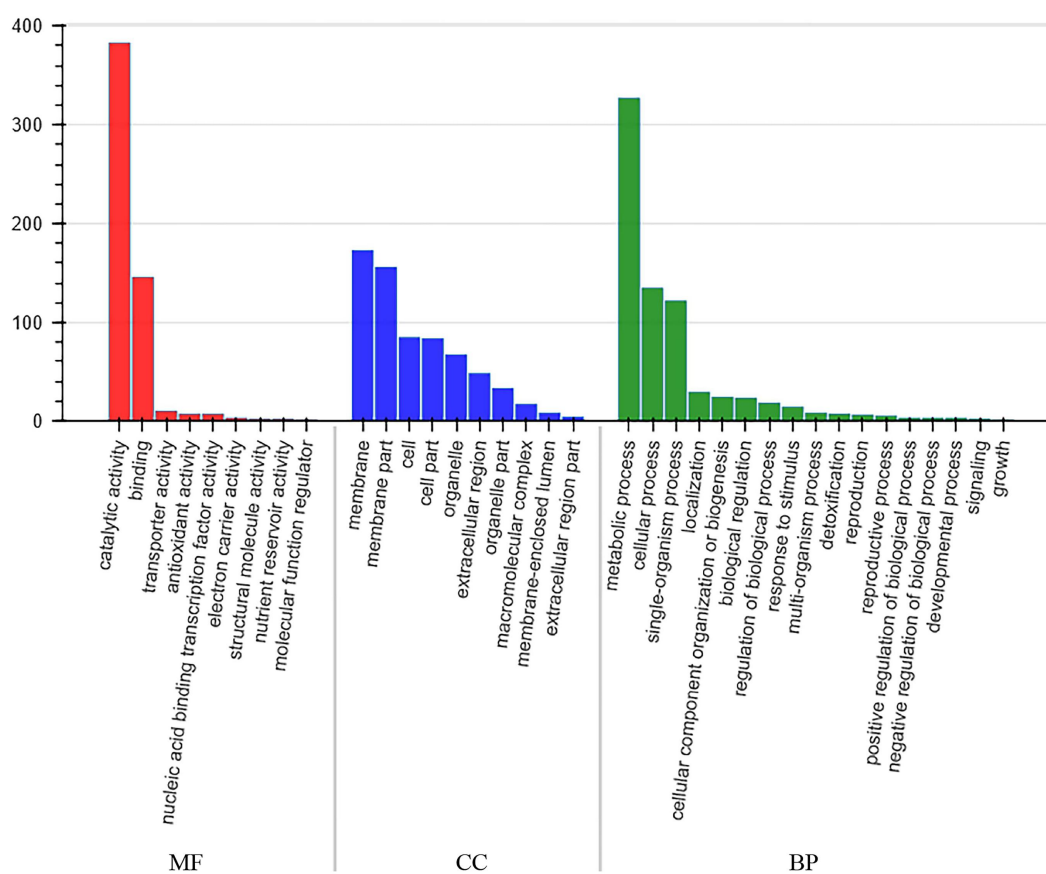

**Figure S2.** Functional annotation of the *T. asperellum* ND-1 secretome showing top 20 hits of different category.

MF, molecular function; CC, cellular component; BP, biological process.

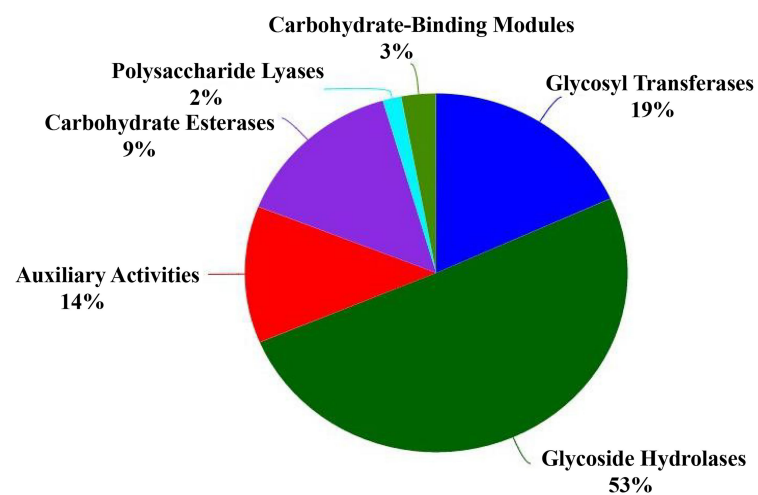

**Figure S3.** Statistical analysis of CAZymes of *T. asperellum* ND-1 genome. Different colors of the pie chart represent different CAZy classifications, and their areas represent the proportion of genes in the classification.

**Table S1.** Genome features of *T. asperellum* ND-1, *T. asperellum* IC-1 and *T. asperellum* CBS 433.97.

| Featuers                  | <i>T. asperellum</i><br>IC-1 | <i>T. asperellum</i><br>ND-1 | <i>T. asperellum</i><br>CBS 433.97 |
|---------------------------|------------------------------|------------------------------|------------------------------------|
| Genome Size (Mb)          | 36.07                        | 35.75                        | 37.46                              |
| Scaffolds                 | 72                           | 32                           | 419                                |
| Contigs                   | 201                          | 32                           | 419                                |
| $N_{50}$ (bp)             | 2,555,590                    | 2032888                      | 2128412                            |
| %(G+C) content            | 48.3                         | 48.65                        | 47.3                               |
| Number of predicted genes | 8,803                        | 10,541                       | 12802                              |

**Table S2.** Repetitive elements identified in the *T. asperellum* ND-1 genome.

| Repetitive elements        | Number of elements | length of sequence | Percentage |
|----------------------------|--------------------|--------------------|------------|
| SINEs                      | 25                 | 1469 bp            | 0.00%      |
| LINEs:                     | 137                | 10278 bp           | 0.03%      |
| LINE1                      | 9                  | 550 bp             | 0.00%      |
| LINE2                      | 37                 | 3023 bp            | 0.01%      |
| L3/CR1                     | 41                 | 2991 bp            | 0.01%      |
| LTR elements:              | 5                  | 301 bp             | 0.00%      |
| ERV1-MaLRs                 | 1                  | 71 bp              | 0.00%      |
| ERV-classI                 | 4                  | 230 bp             | 0.00%      |
| DNA elements:              | 23                 | 2225 bp            | 0.01%      |
| hAT-Charlie                | 4                  | 214 bp             | 0.00%      |
| TcMar-Tigger               | 2                  | 115 bp             | 0.00%      |
| Total interspersed repeats | —                  | 14273 bp           | 0.04%      |
| Small RNA                  | 161                | 26047 bp           | 0.07%      |
| Satellites                 | 2                  | 83 bp              | 0.00%      |
| Simple repeats             | 11997              | 460870 bp          | 1.29%      |
| Low complexity             | 1871               | 91186 bp           | 0.26%      |

**Table S3.** Glycoside hydrolases (GHs) identified in the genome of *T. atroviride* IMI 206040, *T. virens* Gv-298, *T. reesei* QM6a and *T. asperellum* ND-1.

| <i>T. reesei</i> QM6a |     | <i>T. asperellum</i> ND-1 |     | <i>T. atroviride</i> IMI 206040 |     | <i>T. virens</i> Gv-298 |     |
|-----------------------|-----|---------------------------|-----|---------------------------------|-----|-------------------------|-----|
| GH Families           | No. | GH Families               | No. | GH Families                     | No. | GH Families             | No. |
| GH1                   | 2   | GH1                       | 3   | GH1                             | 4   | GH1                     | 2   |
| GH10                  | 1   | GH10                      | 3   | GH10                            | 1   | GH10                    | 2   |
| GH105                 | 2   | GH105                     | 2   | GH105                           | 2   | GH105                   | 2   |
| GH106                 | 1   | GH11                      | 4   | GH106                           | 1   | GH11                    | 4   |
| GH11                  | 3   | GH114                     | 1   | GH11                            | 4   | GH114                   | 1   |
| GH115                 | 1   | GH115                     | 1   | GH114                           | 1   | GH115                   | 1   |
| GH12                  | 2   | GH12                      | 3   | GH115                           | 1   | GH12                    | 4   |
| GH125                 | 2   | GH125                     | 3   | GH12                            | 3   | GH125                   | 3   |
| GH128                 | 4   | GH127                     | 1   | GH125                           | 2   | GH128                   | 5   |
| GH13                  | 5   | GH128                     | 5   | GH127                           | 1   | GH13                    | 6   |
| GH132                 | 2   | GH13                      | 6   | GH128                           | 5   | GH132                   | 2   |
| GH15                  | 2   | GH132                     | 2   | GH13                            | 5   | GH15                    | 2   |
| GH152                 | 1   | GH142                     | 1   | GH132                           | 2   | GH152                   | 1   |
| GH154                 | 1   | GH15                      | 3   | GH142                           | 1   | GH154                   | 2   |
| GH16                  | 16  | GH152                     | 1   | GH15                            | 3   | GH16                    | 16  |
| GH17                  | 1   | GH154                     | 2   | GH152                           | 1   | GH17                    | 1   |
| GH18                  | 19  | GH16                      | 15  | GH154                           | 2   | GH18                    | 32  |
| GH2                   | 7   | GH17                      | 3   | GH16                            | 16  | GH2                     | 11  |
| GH20                  | 3   | GH18                      | 26  | GH17                            | 2   | GH20                    | 3   |
| GH24                  | 1   | GH2                       | 9   | GH18                            | 27  | GH24                    | 1   |
| GH25                  | 1   | GH20                      | 3   | GH2                             | 10  | GH25                    | 1   |
| GH27                  | 2   | GH25                      | 1   | GH20                            | 3   | GH26                    | 2   |
| GH28                  | 4   | GH27                      | 3   | GH25                            | 1   | GH27                    | 3   |
| GH3                   | 13  | GH28                      | 5   | GH27                            | 3   | GH28                    | 6   |
| GH30                  | 5   | GH3                       | 16  | GH28                            | 6   | GH3                     | 17  |
| GH31                  | 4   | GH30                      | 4   | GH3                             | 15  | GH30                    | 6   |
| GH35                  | 1   | GH31                      | 8   | GH30                            | 5   | GH31                    | 5   |
| GH36                  | 1   | GH32                      | 2   | GH31                            | 7   | GH32                    | 1   |
| GH37                  | 2   | GH35                      | 1   | GH32                            | 1   | GH35                    | 1   |
| GH38                  | 1   | GH36                      | 1   | GH35                            | 1   | GH36                    | 1   |
| GH39                  | 1   | GH37                      | 2   | GH36                            | 1   | GH37                    | 2   |
| GH43                  | 2   | GH38                      | 1   | GH37                            | 2   | GH38                    | 2   |
| GH47                  | 8   | GH43                      | 5   | GH38                            | 1   | GH39                    | 1   |
| GH5                   | 8   | GH47                      | 8   | GH43                            | 6   | GH43                    | 3   |
| GH54                  | 2   | GH5                       | 11  | GH47                            | 8   | GH47                    | 8   |
| GH55                  | 6   | GH51                      | 1   | GH5                             | 11  | GH49                    | 1   |

| <b>Table S3 (continued)</b> |     |              |     |              |     |              |     |
|-----------------------------|-----|--------------|-----|--------------|-----|--------------|-----|
| GH6                         | 1   | GH54         | 2   | GH51         | 1   | GH5          | 12  |
| GH62                        | 1   | GH55         | 9   | GH54         | 2   | GH54         | 2   |
| GH63                        | 1   | GH6          | 1   | GH55         | 7   | GH55         | 10  |
| GH64                        | 3   | GH62         | 2   | GH6          | 1   | GH6          | 1   |
| GH65                        | 2   | GH63         | 2   | GH62         | 2   | GH62         | 3   |
| GH67                        | 1   | GH64         | 3   | GH63         | 2   | GH63         | 1   |
| GH7                         | 2   | GH65         | 2   | GH64         | 3   | GH64         | 3   |
| GH71                        | 4   | GH67         | 2   | GH65         | 2   | GH65         | 2   |
| GH72                        | 5   | GH7          | 2   | GH67         | 2   | GH67         | 2   |
| GH74                        | 1   | GH71         | 4   | GH7          | 2   | GH7          | 2   |
| GH75                        | 3   | GH72         | 4   | GH71         | 4   | GH71         | 5   |
| GH76                        | 8   | GH75         | 4   | GH72         | 5   | GH72         | 6   |
| GH78                        | 1   | GH76         | 7   | GH74         | 1   | GH74         | 1   |
| GH79                        | 4   | GH78         | 3   | GH75         | 6   | GH75         | 5   |
| GH81                        | 2   | GH79         | 3   | GH76         | 9   | GH76         | 9   |
| GH89                        | 2   | GH81         | 2   | GH78         | 3   | GH78         | 3   |
| GH92                        | 7   | GH88         | 1   | GH79         | 4   | GH79         | 4   |
| GH95                        | 4   | GH89         | 1   | GH81         | 2   | GH81         | 2   |
| <b>Total</b>                | 189 | GH92         | 8   | GH88         | 2   | GH88         | 3   |
|                             |     | GH93         | 2   | GH89         | 1   | GH89         | 1   |
|                             |     | GH95         | 4   | GH92         | 8   | GH92         | 7   |
|                             |     | <b>Total</b> | 234 | GH93         | 3   | GH93         | 1   |
|                             |     |              |     | GH95         | 4   | GH95         | 4   |
|                             |     |              |     | GH99         | 1   | <b>Total</b> | 250 |
|                             |     |              |     | <b>Total</b> | 242 |              |     |
